# Supplementary material for: Primary Human Renal Proximal Tubular Epithelial Cells (pHRPTEpiCs): Shiga Toxin (Stx) Glycosphingolipid Receptors, Stx Susceptibility, and Interaction with Membrane Microdomains
Source: MDPI journal article supplement (doi:10.3390/toxins13080529), 2021-07-28
Supplement: s1 [file s1]

## Supplementary Materials: Primary Human Renal Proximal Tubular Epithelial Cells (pHRPTEpiCs): Shiga Toxin (Stx) Glycosphingolipid Receptors, Stx Susceptibility and Interaction with Membrane Microdomains

Johanna Detzner, Anna-Lena Klein, Gottfried Pohlentz, Elisabeth Krojnewski, Hans-Ulrich Humpf, Alexander Mellmann, Helge Karch and Johannes Müthing

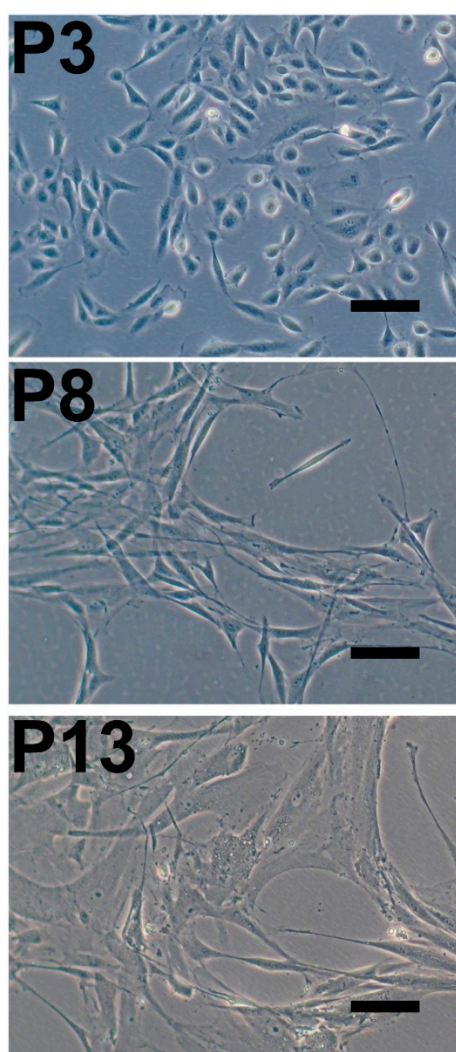

**Figure S1.** Light microscopy micrographs of pHRPTEpiCs during passage 3 (**P3**), passage 8 (**P8**), and passage 13 (**P13**) at approximate 30% confluence. Original magnification  $\times 10$ . Bar: 100  $\mu\text{m}$ .

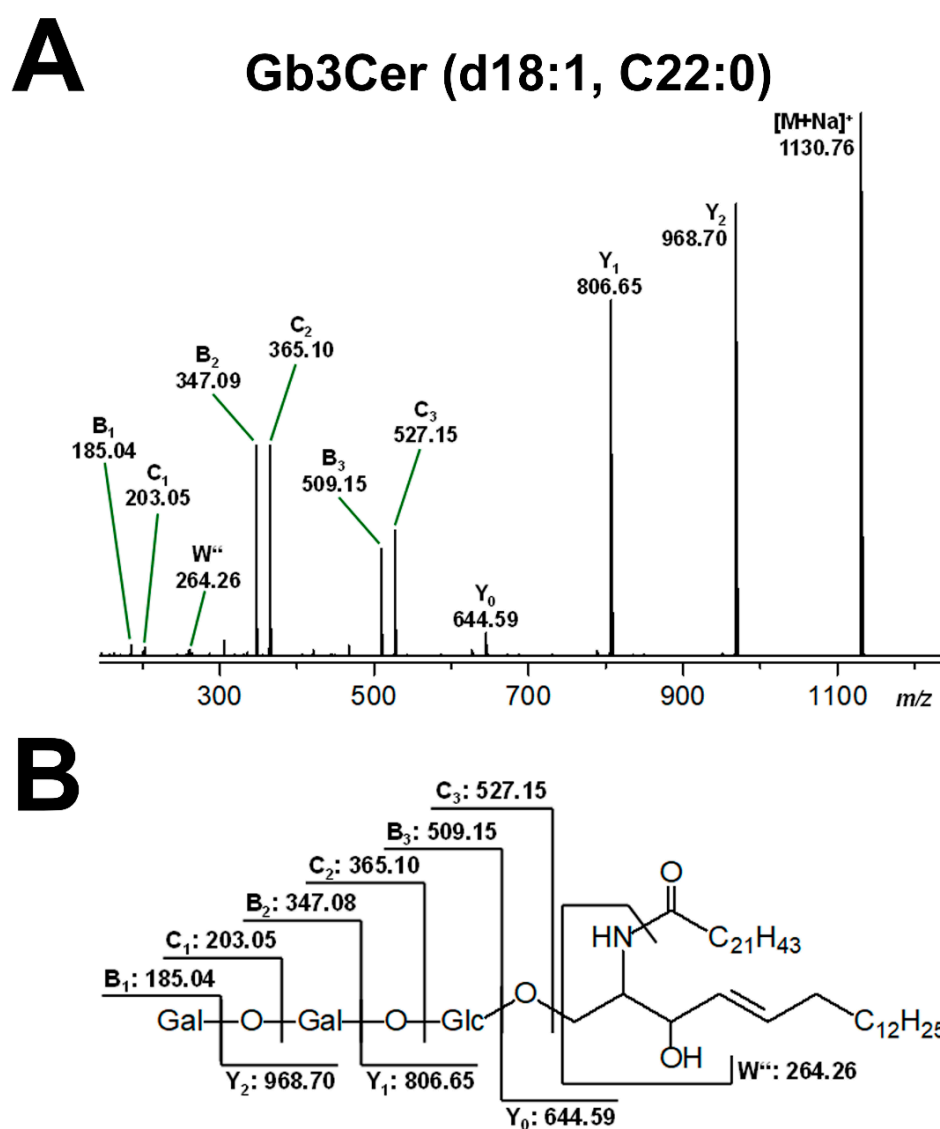

**Figure S2.** MS<sup>2</sup> spectrum of Gb3Cer (d18:1, C22:0) (A) and corresponding fragmentation scheme (B) obtained from pHRPTEpiCs.

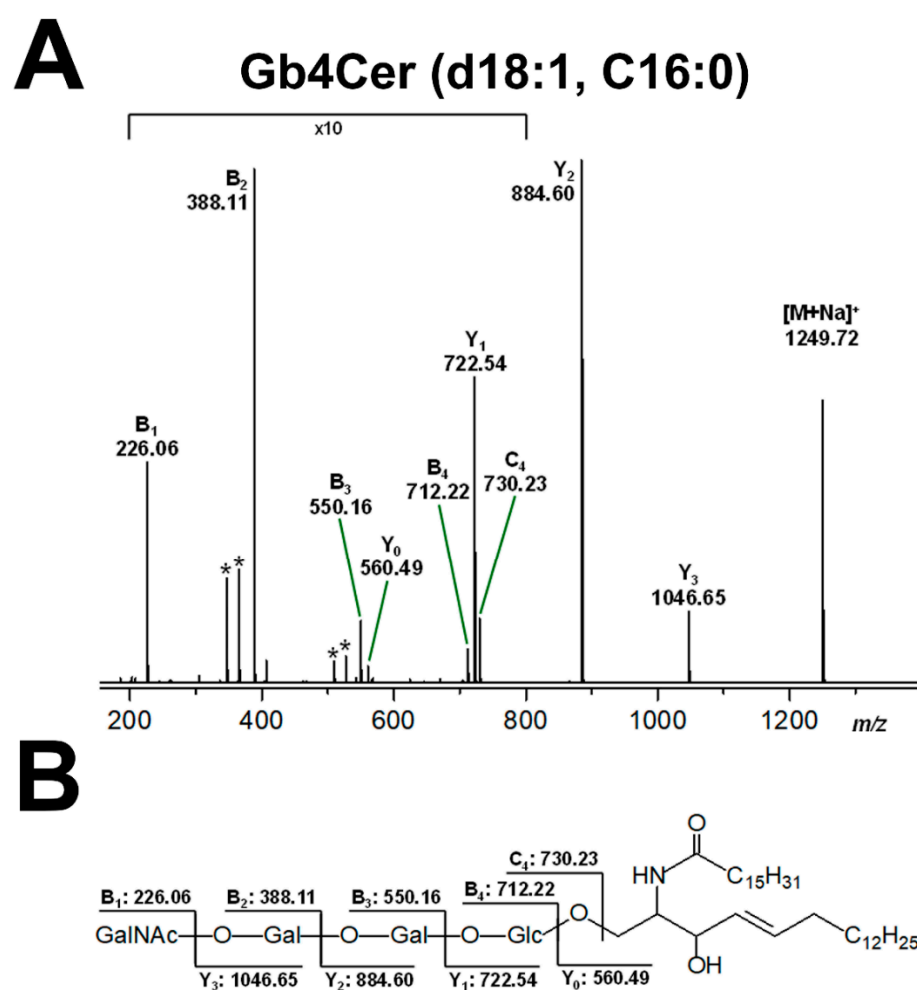

**Figure S3.** MS<sup>2</sup> spectrum of Gb4Cer (d18:1, C16:0) (A) and corresponding fragmentation scheme (B) obtained from pHRPTEpiCs.

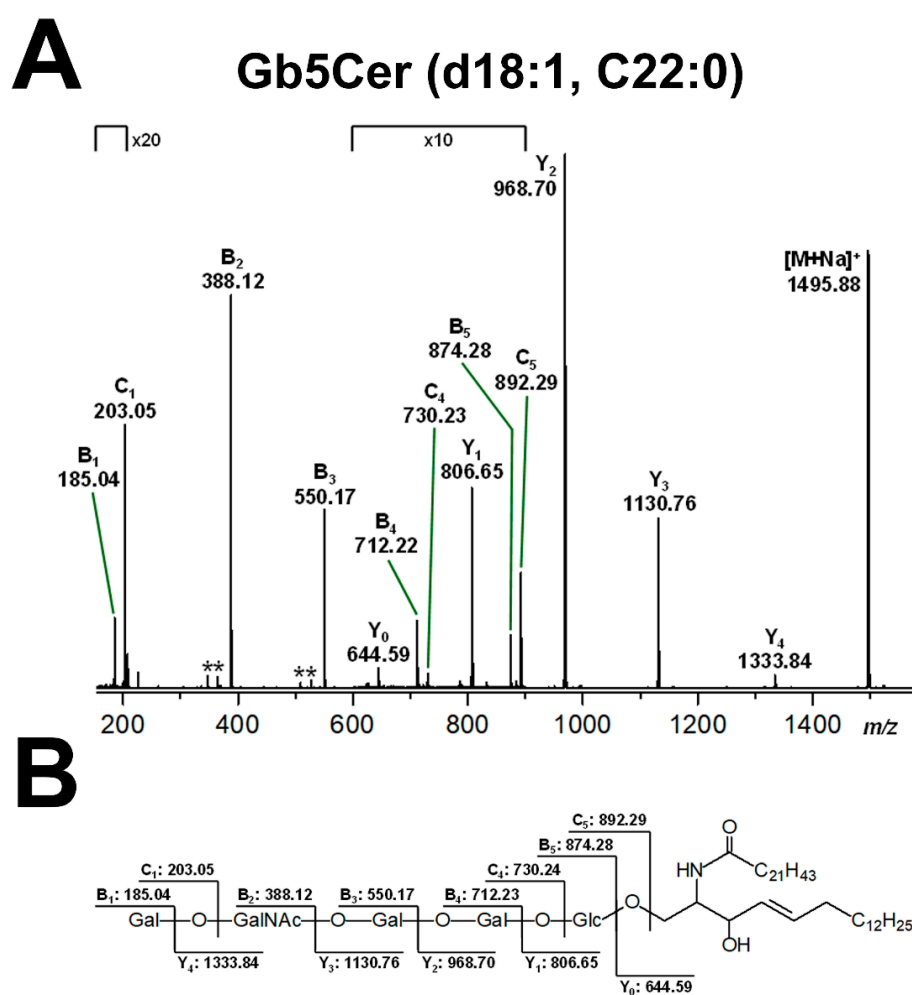

**Figure S4.** MS<sup>2</sup> spectrum of Gb5Cer (d18:1, C22:0) (A) and corresponding fragmentation scheme (B) obtained from pHRPTEpiCs.

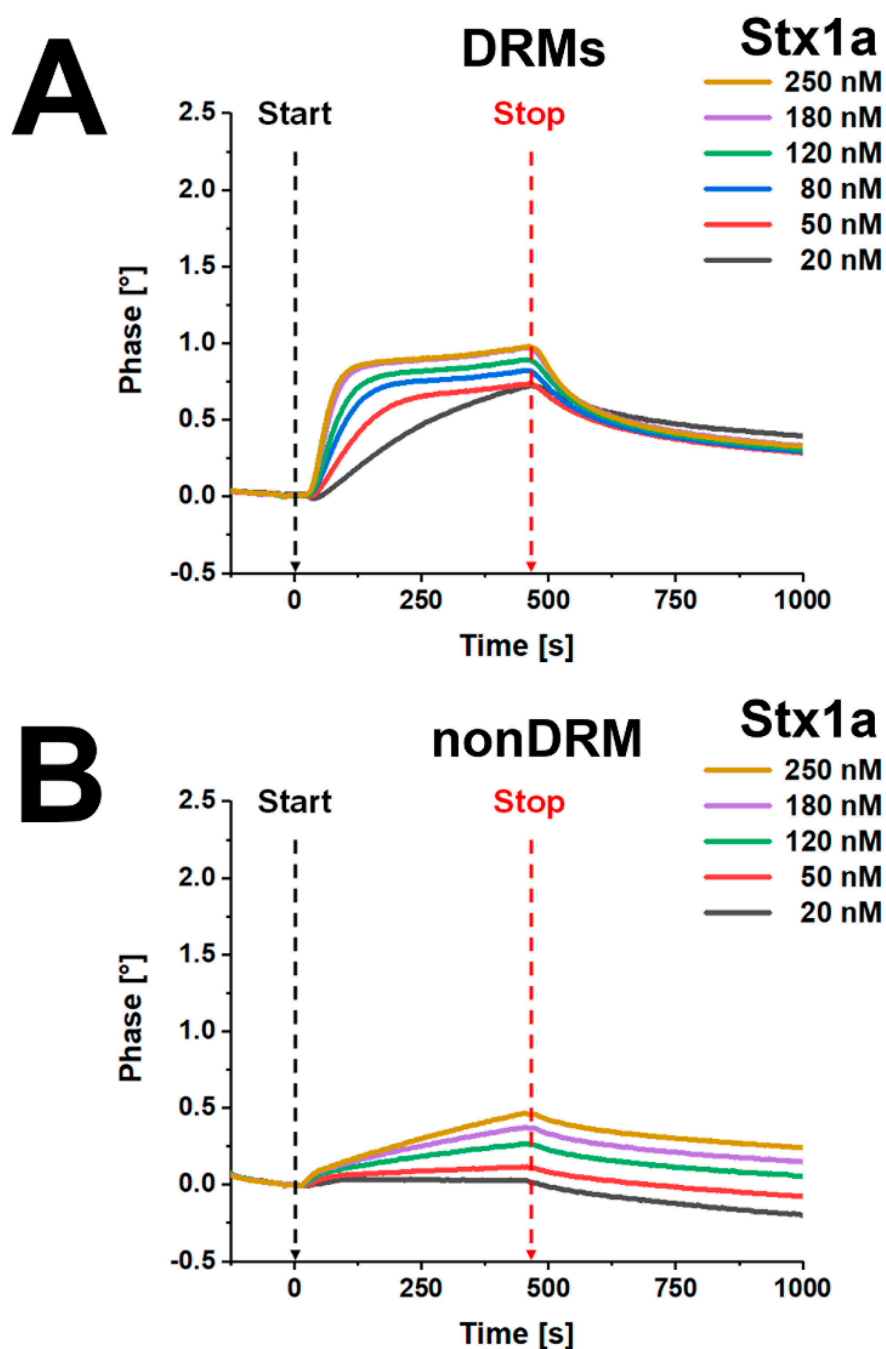

**Figure S5.** SAW real-time interaction sensorgrams gained for binding of Stx1a towards DRM (A) and nonDRM fractions (B) prepared from replicate 1 of pHRPTEpiCs.

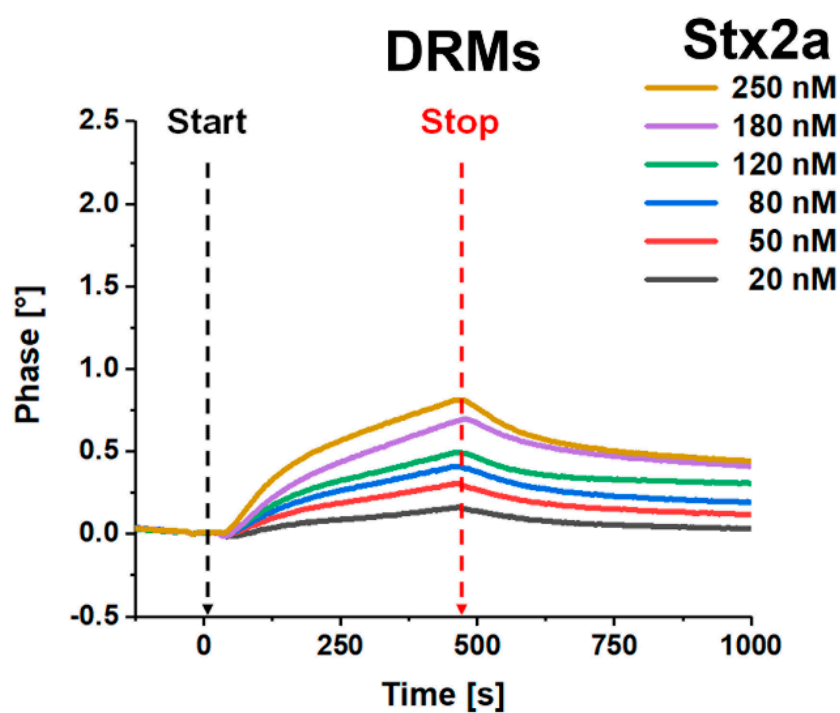

**Figure S6.** SAW real-time interaction sensorgrams gained for binding of Stx2a towards DRM fractions prepared from replicate 1 of pHRPTEpiCs.

**Table S1.** Relative distribution of Gb3Cer, Gb4Cer, and cholesterol in sucrose gradient fractions obtained from pHRPTEpiCs.**Gb3Cer**

| Fraction                 | Replicate 1 (%) |                | Replicate 2 (%) |                |
|--------------------------|-----------------|----------------|-----------------|----------------|
| F1 DRM (top)             | 0.0             |                | 14.8            |                |
| F2 DRM (top)             | 49.6            |                | 48.9            |                |
| F3 DRM (top)             | 16.4            | Σ66.0 (F1–F3)  | 14.1            | Σ77.8 (F1–F3)  |
| F4 nonDRM (intermediate) | 7.7             |                | 8.1             |                |
| F5 nonDRM (intermediate) | 8.9             |                | 5.4             |                |
| F6 nonDRM (intermediate) | 8.4             | Σ25.0 (F4–F6)  | 0.0             | Σ13.5 (F4–F6)  |
| F7 nonDRM (bottom)       | 7.0             |                | 7.7             |                |
| F8 nonDRM (bottom)       | 2.0             | Σ9.0 (F7–F8)   | 1.0             | Σ8.7 (F7–F8)   |
|                          |                 | Σ100.0 (F1–F8) |                 | Σ100.0 (F1–F8) |

**Gb4Cer**

| Fraction                 | Replicate 1 (%) |                | Replicate 2 (%) |                |
|--------------------------|-----------------|----------------|-----------------|----------------|
| F1 DRM (top)             | 0.0             |                | 10.1            |                |
| F2 DRM (top)             | 64.9            |                | 59.1            |                |
| F3 DRM (top)             | 15.9            | Σ80.8 (F1–F3)  | 11.7            | Σ80.9 (F1–F3)  |
| F4 nonDRM (intermediate) | 5.4             |                | 5.9             |                |
| F5 nonDRM (intermediate) | 5.0             |                | 2.1             |                |
| F6 nonDRM (intermediate) | 3.8             | Σ14.2 (F4–F6)  | 0.0             | Σ8.0 (F4–F6)   |
| F7 nonDRM (bottom)       | 5.0             |                | 9.8             |                |
| F8 nonDRM (bottom)       | 0.0             | Σ5.0 (F7–F8)   | 1.3             | Σ11.1 (F7–F8)  |
|                          |                 | Σ100.0 (F1–F8) |                 | Σ100.0 (F1–F8) |

**Cholesterol**

| Fraction                 | Replicate 1 [%] |                | Replicate 2 [%] |                |
|--------------------------|-----------------|----------------|-----------------|----------------|
| F1 DRM (top)             | 0.0             |                | 4.8             |                |
| F2 DRM (top)             | 57.4            |                | 47.5            |                |
| F3 DRM (top)             | 13.3            | Σ70.7 (F1–F3)  | 14.9            | Σ67.2 (F1–F3)  |
| F4 nonDRM (intermediate) | 6.1             |                | 9.3             |                |
| F5 nonDRM (intermediate) | 9.0             |                | 7.8             |                |
| F6 nonDRM (intermediate) | 5.3             | Σ20.4 (F4–F6)  | 0.0             | Σ17.1 (F4–F6)  |
| F7 nonDRM (bottom)       | 7.5             |                | 14.1            |                |
| F8 nonDRM (bottom)       | 1.4             | Σ8.9 (F7–F8)   | 1.6             | Σ15.7 (F7–F8)  |
|                          |                 | Σ100.0 (F1–F8) |                 | Σ100.0 (F1–F8) |

**Table S2.** Calculated association  $k_{ass}$  and dissociation  $k_{diss}$  rate constants and equilibrium dissociation constant  $K_D$  for Stx1a using DRMs of pHRPTEpiCs<sup>a</sup>.

| Sensor channel  | $k_{ass}$ (nM <sup>-1</sup> s <sup>-1</sup> ) <sup>b</sup> | $k_{diss}$ (s <sup>-1</sup> ) <sup>b</sup> | $K_D$ (nM) <sup>b</sup> |
|-----------------|------------------------------------------------------------|--------------------------------------------|-------------------------|
| 1               | $1.0 \times 10^{-4}$                                       | $8.8 \times 10^{-3}$                       | 88.3                    |
| 2               | $1.0 \times 10^{-4}$                                       | $8.2 \times 10^{-3}$                       | 81.8                    |
| 3               | $1.0 \times 10^{-4}$                                       | $7.4 \times 10^{-3}$                       | 73.9                    |
| 4               | $0.9 \times 10^{-4}$                                       | $6.9 \times 10^{-3}$                       | 76.2                    |
| 5               | $0.8 \times 10^{-4}$                                       | $6.2 \times 10^{-3}$                       | 77.5                    |
| Mean value      | $0.9 \times 10^{-4}$                                       | $7.5 \times 10^{-3}$                       | 79.5                    |
| SD <sup>c</sup> | $8.9 \times 10^{-6}$                                       | $1.0 \times 10^{-3}$                       | 5.7                     |

<sup>a</sup> Constants were determined by real-time interaction analysis of Stx1a with sensor surface-coated pooled DRM fractions F1-F3 prepared from replicate 1 of pHRPTEpiCs; <sup>b</sup>  $k_{ass}$ ,  $k_{diss}$  and  $K_D$  values were obtained for Stx1a and correspond to sensorgrams of Figure 12; <sup>c</sup> SD, standard deviation.
